# Supplementary material
Source: PubMed Central journal article supplement (PMC2834414)
Supplement: NIHMS165690-supplement-1.pdf [file NIHMS165690-supplement-1.pdf]

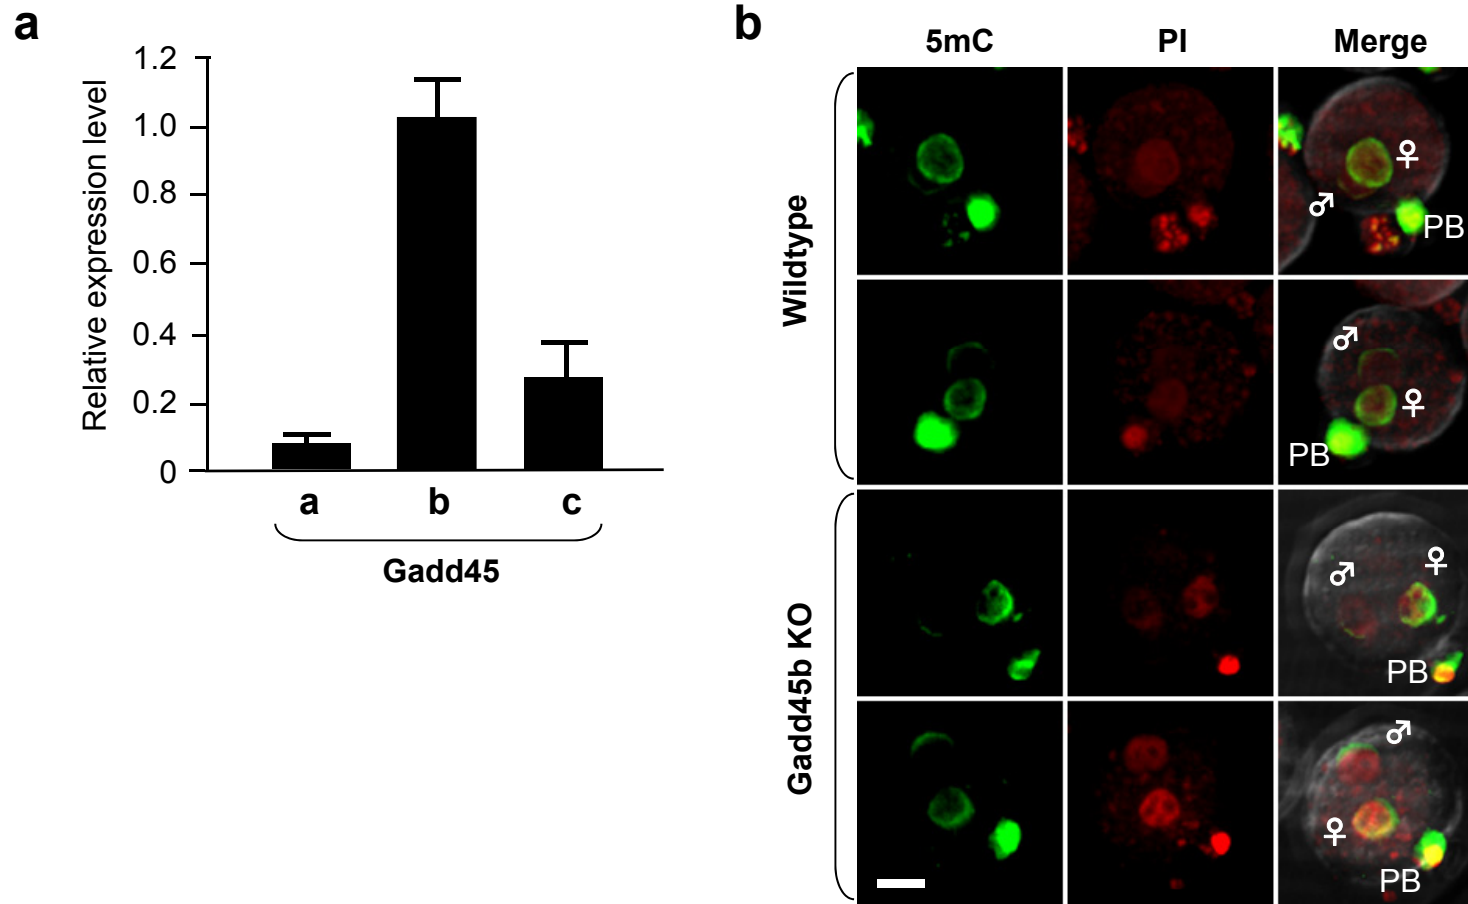

**Figure S1.** Gadd45b-deficiency does not affect paternal DNA demethylation (a) Relative expression level of Gadd45 family members in mouse zygotes. (b) 5mC staining of wildtype and Gadd45b-deficient zygotes at pronuclear (PN) stage 4-5. Pronuclear staging and genders were determined based on criteria defined previously (Santos et al. 2002, *Dev. Biol.* 241, 172-182). 5mC-positive signal was detected using FITC-labeled secondary antibody (green; left column). DNAs were stained with PI (red; middle column). ♂: male pronucleus, ♀: female pronucleus, PB: polar body. Bar = 25  $\mu$ m.

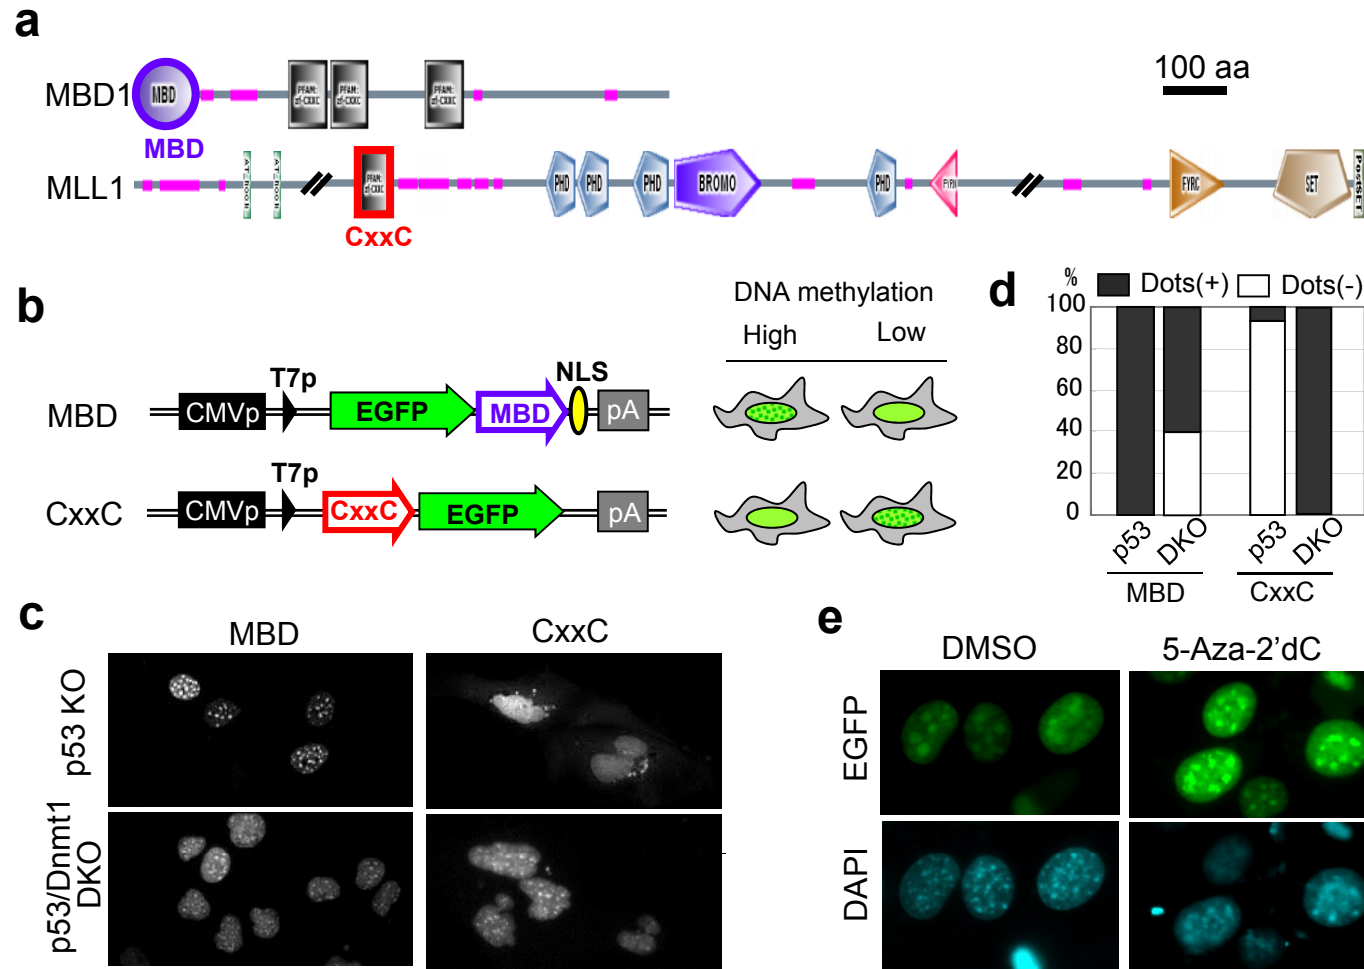

**Figure S2.** Construction and evaluation of a CxxC-EGFP reporter for monitoring DNA methylation state in real-time.

(a) Domain/motif structure of MBD1 and MLL1 proteins.

(b) Schematic representation of MBD-EGFP and CxxC-EGFP expression constructs and the expected subcellular distribution of the encoded proteins. The CMV promoter allows for expression in mammalian cells and the T7 promoter allows for *in vitro* generation of mRNA. An optimal polyA tail was engineered for efficient translation in zygotes.

(c) Subcellular distribution of EGFP-MBD (left) and CxxC-EGFP (right) reporters in p53 knockout (normal DNA methylation, top panels) and p53/Dnmt1 double knockout (low DNA methylation, bottom panels).

(d) Quantification of the results shown in (c). The data is presented as percentage of cells with nuclear dots over total transfected cells.

(e) Enhanced nuclear dot-formation of CxxC probe by 5-Aza-dC-mediated DNA demethylation. NIH3T3 cells that stably express CxxC-EGFP were selected in the presence of 1 mg/ml G418. 5-Aza-dC (Sigma-Aldrich) was applied at the concentration of 5  $\mu$ M for 72 hours before DAPI staining and imaging.

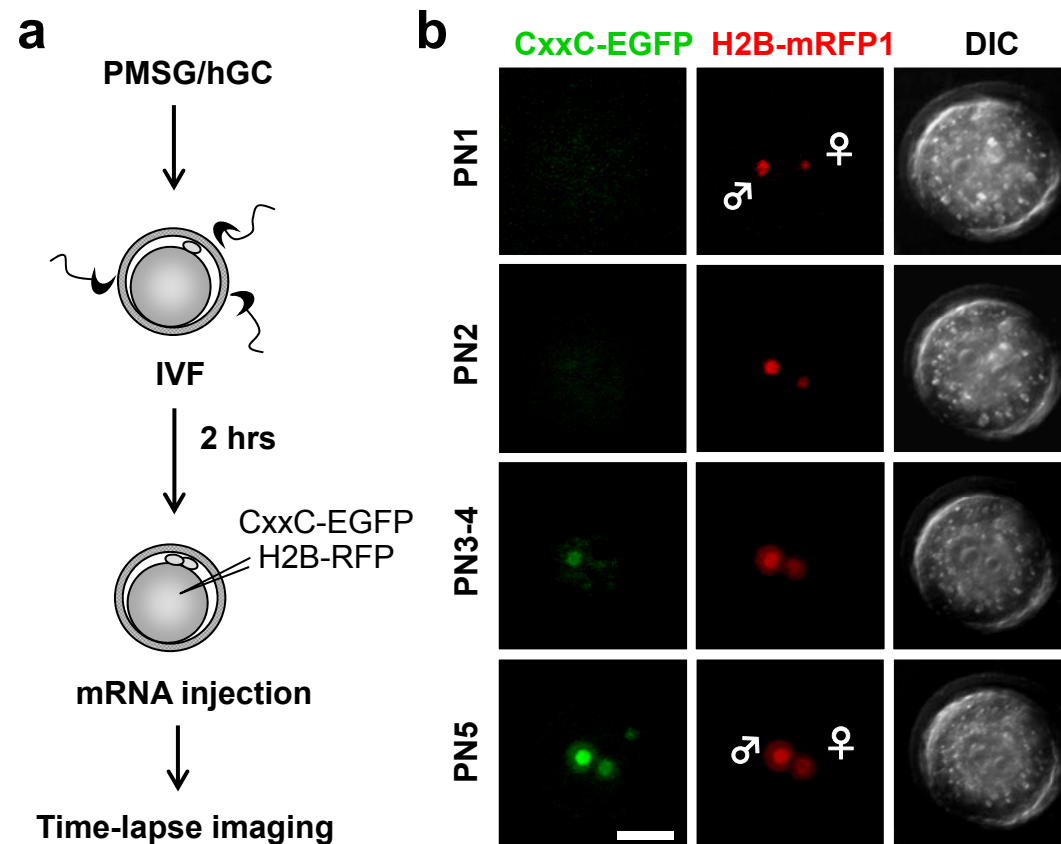

**Figure S3.** Evaluation of CxxC-EGFP reporter in zygote

(a) Scheme of the experimental design.

(b) Representative images to illustrate the dynamics of CxxC-EGFP distribution during zygotic development by time-lapse imaging. ♂: male pronucleus, ♀: female pronucleus. Bar = 25  $\mu$ m.

**a**

| Gene      | Motif/Domain           | Proposed function(s)                              | Knockdown efficiency at PN5 |
|-----------|------------------------|---------------------------------------------------|-----------------------------|
| Cyp11a1   | P450 family            | Fat metabolism                                    | 90%                         |
| Smc6-like | smc                    | Unknown                                           | 86% (#1+#2)                 |
| Brm       | HAT                    | Transcriptional coactivator                       | 88%                         |
| Alkbh5    | Alk                    | 3'MeC (N-C bond) demethylase                      | 85%                         |
| Nfu I     | Fe-S clustering        | Hira-binding protein                              | 80%                         |
| Elp3      | HAT<br>Fe-S clustering | Elongation, tRNA modification,<br>Fe-S clustering | 98% (#1)<br>95% (#2)        |

**b**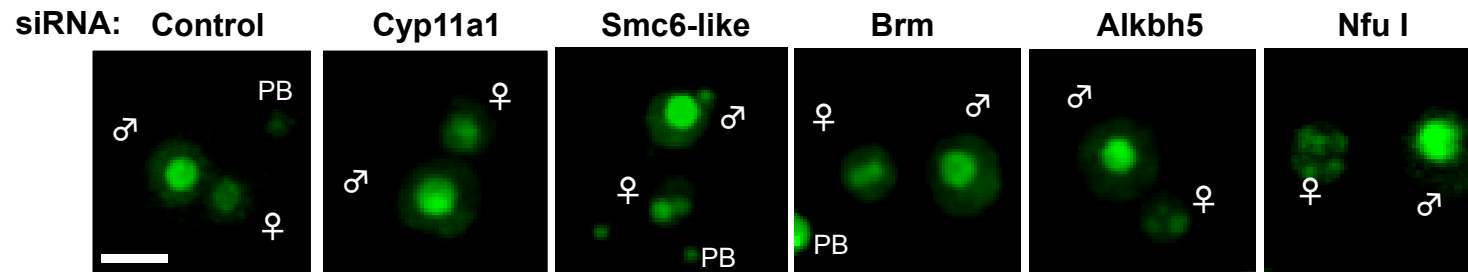

**Figure S4.** List of candidates with over 80% of knockdown achieved in zygotes and the distribution of the CxxC-EGFP at PN4-5 stage

(a) A list of tested candidates with over 80% of knockdown by RNAi. Knockdown efficiency was determined by RT-qPCR.

(b) Representative images of CxxC-EGFP distribution at PN4-5 after RNAi. ♂: male pronucleus, ♀: female pronucleus, PB: polar body. Bar = 25  $\mu$ m.

**siControl**

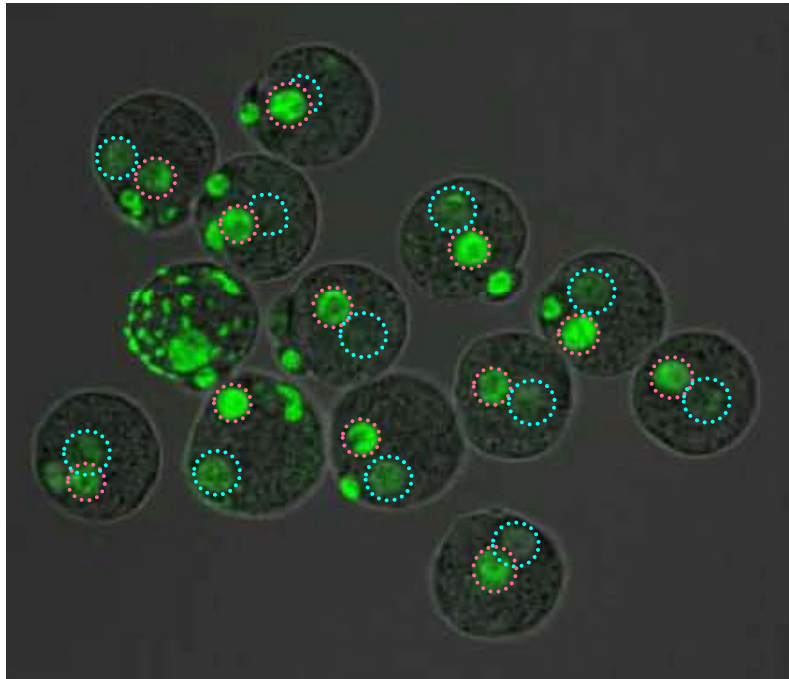

**siElp3**

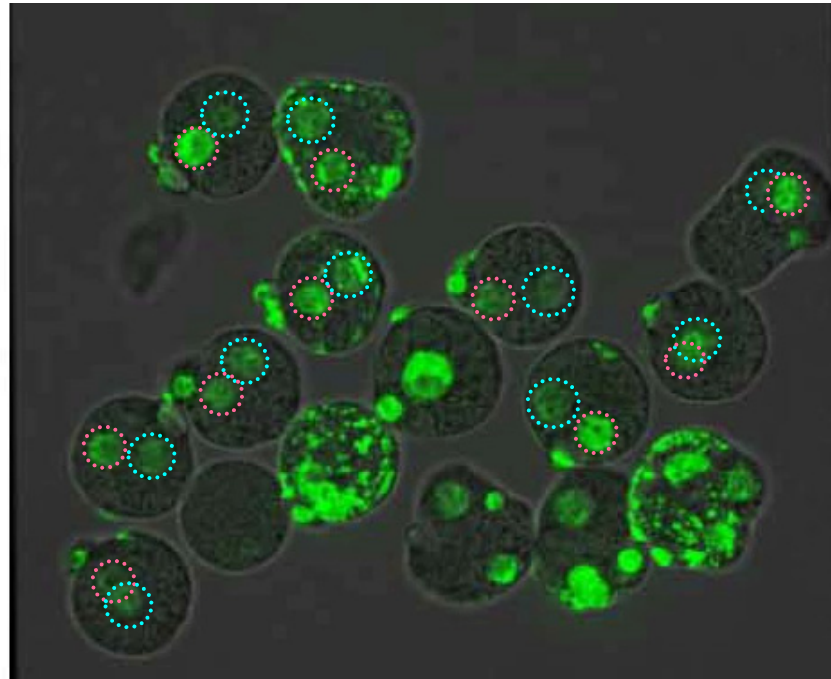

**Figure S5.** Representative images of 5mC staining in PN4-5 zygotes with (right panel) or without (left panel) Elp3 siRNA. Paternal and maternal pronuclei are indicated by blue and pink dotted circles, respectively.

**a**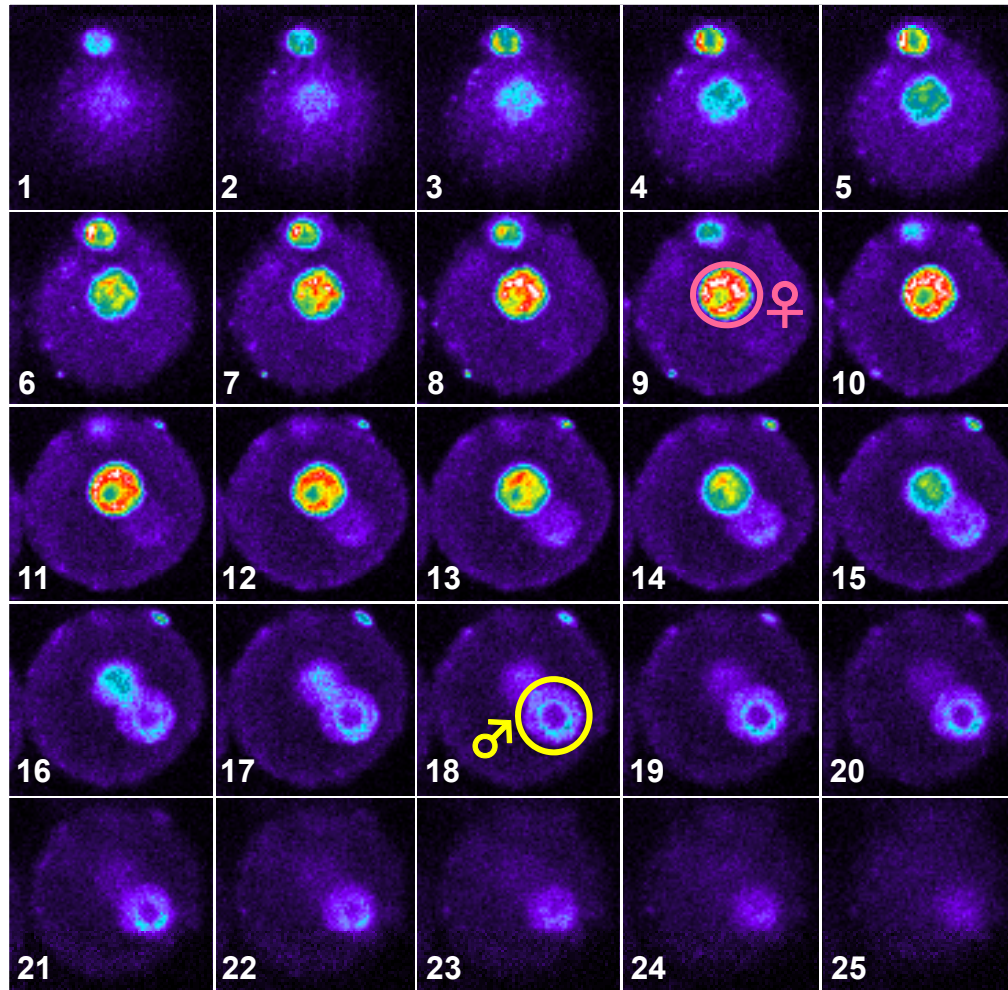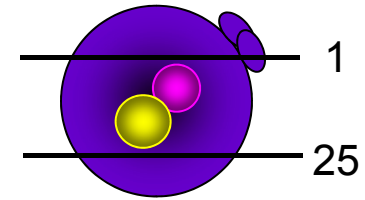**b**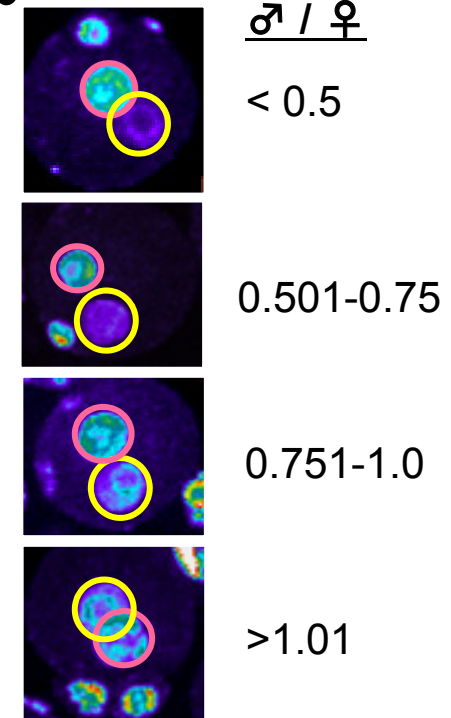

**Figure S6.** Quantification of 5mC intensity using MetaMorph. (a) Series of Z-sectioned images are pseudocolored to identify the section which contains either male or female pronucleus (PN) with the highest 5mC intensity. In this example, Section #9 contains the female PN with the highest intensity, whereas #18 contains male PN with the highest intensity. The value is calculated as a ratio (male/female) of 5mC intensity. (b) Representative Z-stacked images of 5mC staining in zygotes with different  $\frac{\text{♂}}{\text{♀}}$  values. ♂: male PN, ♀: female PN.

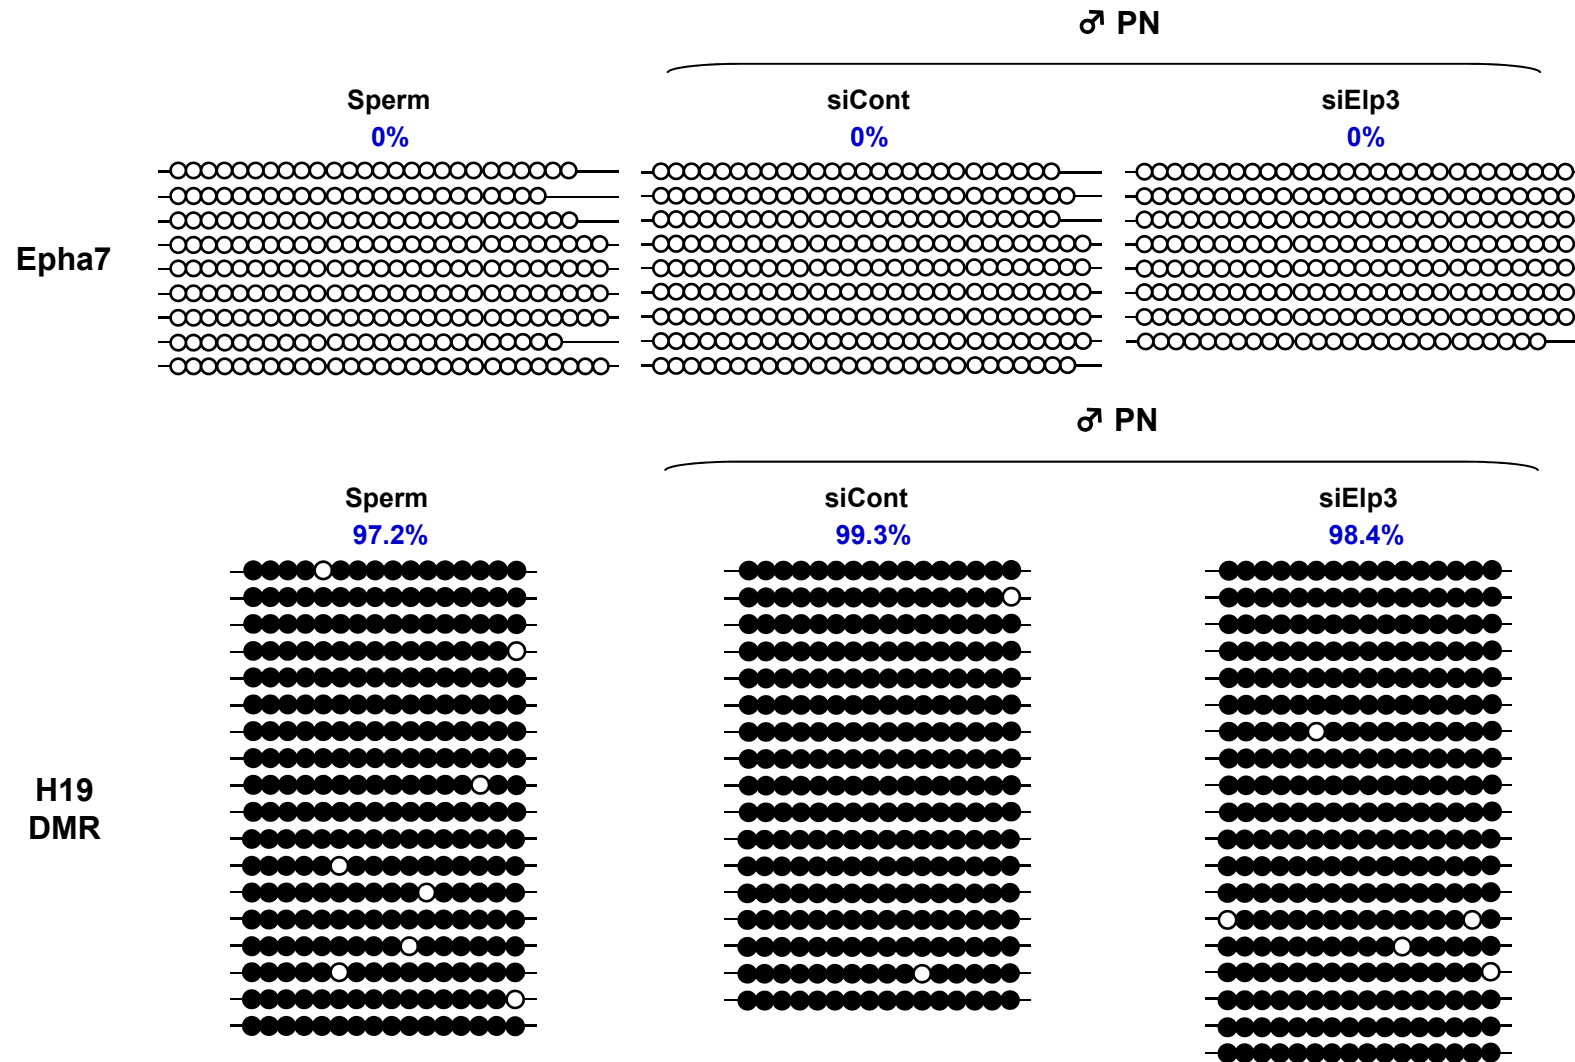

**Figure S7.** Bisulfite sequencing indicates that knockdown of Elp3 does not affect the methylation state of paternal H19 DMR or Epha7. Open circles and closed circles represent unmethylated and methylated CpG respectively. Each line represents an individual clone. 28 CpGs and 16 CpGs were analyzed for Epha7 and H19 respectively.

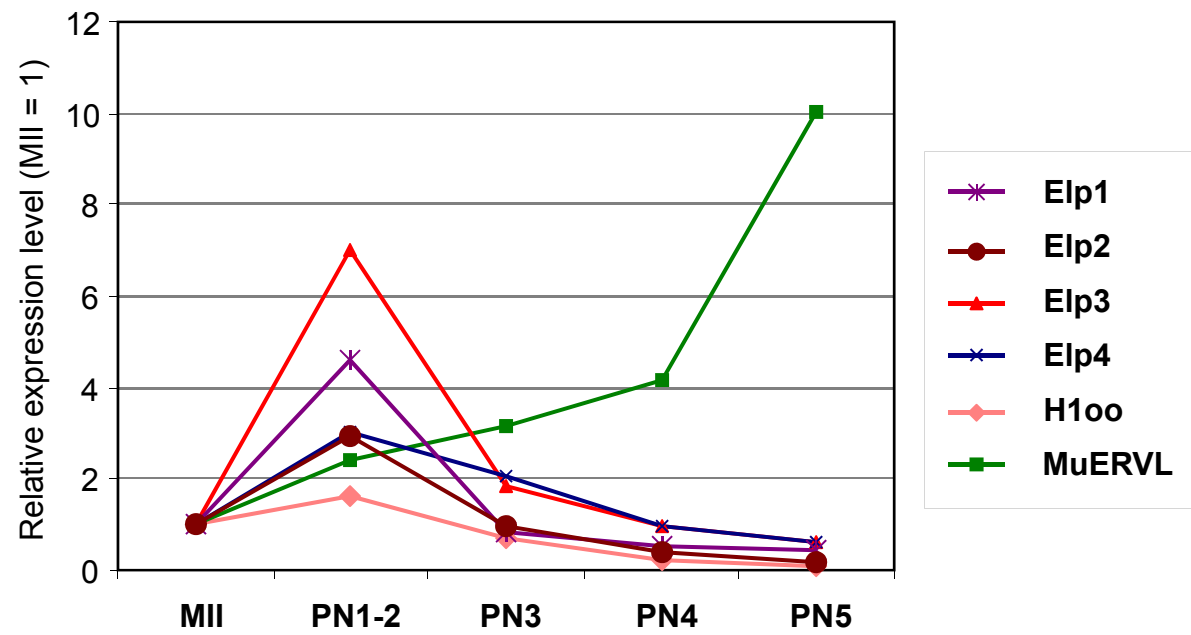

**Figure S8.** Relative expression levels of Elp family members at different zygotic stages determined by RT-qPCR. Results are normalized by 18S, and the MII expression level is set as 1.0. H1oo and MuERVL are served as controls whose expression patterns during the zygotic development are consistent with previous reports.

Table S1. siRNA sequences

| Gene name        | Ambion siRNA ID# | Sense sequence (5'→3')                 |
|------------------|------------------|----------------------------------------|
| Negative control | n/a              | No information available (Cat# AM4611) |
| Elp1             | s106425          | GACUGACAGGUGUCGCUUUtt                  |
| Elp3 #1          | s92451           | CAUCCGAAGUUUACACGAUtt                  |
| Elp3 #2          | s92453           | GUGUUUCCAUAGUCCGAGAtt                  |
| Elp4             | s211969          | GCACCACUACUUGAUGAUAtt                  |
| Cyp11a1          | s64660           | GCUUCGUAAUUACAAGAUUtt                  |
| Smc6-lile #1     | s84719           | GAUCUGCCCAGAACGGAUAtt                  |
| Smc6-lile #2     | s84718           | CCGUGGUUUCUACUAGGAAtt                  |
| Brm              | s84569           | GAGCGAAUCCGUAAUCAUAtt                  |
| Alkbh5           | s113995          | ACCCUGCGCUGAAACCCAAtt                  |
| NfuI             | s80958           | GCAGUUAUUCAGAAUUGAAtt                  |

Table S2. Primer sequences for qPCR

| Gene      | Forward (5'→3')           | Reverse (5'→3')          |
|-----------|---------------------------|--------------------------|
| 18S       | CGGCTACCACATCCAAGGAA      | AGCTGGAATTACCGCGGC       |
| Gadd45a   | TGCGAGAACGACATCAACAT      | TCCCGGCAAAAACAAATAAG     |
| Gadd45b   | GTTCTGCTGCGACAATGACA      | TTGGCTTTTCCAGGAATCTG     |
| Gadd45c   | ATGACTCTGGAAGAAGTCCGT     | CAGGGTCCACATTCAGGACT     |
| Elp1      | GAGTCAGACCTCTTCTCGGAAA    | CGCACCTCATCTTTTAGCTTCT   |
| Elp2      | CTTTCGAAACCAAGGATGGTAG    | CAGAGAATCATGGTTTTGTCCA   |
| Elp3      | TCCGTGCTAGATATGACCCTTT    | CATCGTGTAAACTTCGGATGAA   |
| Elp4      | ACTCCCTGCACCACTACTTGAT    | AATCCATGCCACTTTGAACTCT   |
| Cyp11a1   | CCAGTGTCCCATGCTCAA        | CAGCTGCATGGTCCTTCCA      |
| Smc6-lile | CGTACTGAAGGGGAATTGTGA     | AGGAACAGCTGGCTTTCTAGG    |
| Brm       | GAGGAGGAGGAGGAAGAAGAAG    | GCTGCTTTCATCTATTGGCTCT   |
| Alkbh5    | ACAGAGGCCTTCTAAGCAGC      | CTGACCCCAAAGAGACTTCC     |
| NfuI      | ATGGGGAGCAGCGGTGCGGTGTAGT | TGCGCGCAGCGGGAAAAGTGGTCT |
| H1oo      | ACTGGAGATGGCACCTAAGAAA    | TCGATTTCTCACCTTTGGTTTT   |
| MuERVL    | AAATGACTTGAGATGCCTGAT     | TGCGTCTTATAGAGCTGGTGAA   |

Table S3. Primer sequences and reaction conditions for bisulfite PCR

| Gene                  |     | Forward (5'→3')                     | Reverse (5'→3')                    | Taq <sup>a</sup> | PCR <sup>b</sup> |
|-----------------------|-----|-------------------------------------|------------------------------------|------------------|------------------|
| Line1-5'<br>(Ref. 27) | 1st | GTTAGAGAATTTGATAGTTTT<br>TGGAATAGG  | CCAAAACAAAACCTTTCTC<br>AAACACTATAT | Platinum         | A                |
|                       | 2nd | TAGGAAATTAGTTTGAATAGG<br>TGAGAGGT   | TCAAACACTATATTACTTTA<br>ACAATTCCCA |                  |                  |
| ETn<br>(Ref. 26)      | 1st | CTTAACTACATTTCTTCTTTT<br>ACC        | AGTTAGYGTTAGTATGTGTA<br>TTTGT      | Platinum         | A                |
|                       | 2nd | TCTAAATTCCTCTCTTACAAC<br>T          |                                    |                  |                  |
| H19<br>(Ref. )        | 1st | GAGTATTTAGGAGGTATAAGA<br>ATT        | ATCAAAAATAACATAAACC<br>CCT         | Ex<br>HS         | B                |
|                       | 2nd | GTAAGGAGATTATGTTTATTT<br>TTGG       |                                    |                  |                  |
| Epha7<br>(Ref. )      | 1st | TGAGTAGTATTGTTATATATA<br>GGAGTGTAAG | CTCCAATAATATCAATTAAA<br>AAAAA      | Platinum         | C                |
|                       | 2nd | GTGAAGTTGTAGTAGTTAAAA<br>GTTAAGTGT  |                                    |                  |                  |

a) Platinum: Platinum Taq polymerase (Invitrogen), Ex HS: Ex Taq HS (TaKaRa)

b) A: Both first and second-round PCRs were performed under the following conditions: 2 min at 95°C, followed by 45 cycles of PCR consisting of 30 sec at 94°C, 30 sec at 50°C, 1 min at 72°C. B: First-round PCR was performed under the following conditions: 4 min at 94°C, 2 min at 55°C, and 2 min at 72°C for two cycles. Forty-eight cycles of PCR were then performed for 1 min at 94°C, 2 min at 55°C, and 2 min at 72°C. The condition for the second round was the same as the first round except that the first two cycles were omitted and total cycle number was 50. C: First-round PCR was performed under the following conditions: 5 min at 95°C, followed by 4 cycles of PCR consisting of 1 min at 94°C, 2 min at {56 → 55 → 54 → 53 (reduce 1°C at every cycle)} °C, 2 min at 72°C, followed by 41 cycles of 1 min at 94°C, 1 min at 53°C, and 1 min at 72°C. The second round PCR consists of 5 min at 95°C, followed by 45 cycles of PCR consisting of 1 min at 94°C, 1 min at 53°C, and 1 min at 72°C.
